# Supplementary material
Source: PubMed Central journal article supplement (PMC2975715)
Supplement: supp_M008573_jlr.M008573-1.pdf [file supp_M008573_jlr.M008573-1.pdf]

## Supplemental materials

**Supplemental Table 1.** Antioxidant activity of recombinant apolipoproteins against LDL in vitro.

| Group                          | LDL (mg/L) | CuSO <sub>4</sub> (μM) | ApoA-I (mg/L) | nmol MDA/mg LDL | IC <sub>50</sub> (mg/L) |
|--------------------------------|------------|------------------------|---------------|-----------------|-------------------------|
| <b>Cu<sup>2+</sup> only</b>    | 100        | 5                      | 0             | 41.19±1.33      |                         |
| <b>ApoA-Iwt</b>                | 100        | 5                      | 10            | 39.91±0.77      | 263.95                  |
|                                | 100        | 5                      | 50            | 33.84±1.99      |                         |
|                                | 100        | 5                      | 100           | 28.77±2.50      |                         |
|                                | 100        | 5                      | 300           | 21.02±1.06      |                         |
| <b>ApoA-Iwt+GSH</b>            | 100        | 5                      | 10            | 36.84±2.71      | 238.37                  |
|                                | 100        | 5                      | 50            | 31.68±1.90      |                         |
|                                | 100        | 5                      | 100           | 24.98±2.04      |                         |
|                                | 100        | 5                      | 300           | 19.41±4.46      |                         |
| <b>ApoA-I(N74C)</b>            | 100        | 5                      | 10            | 37.90±0.88      | 72.19                   |
|                                | 100        | 5                      | 50            | 30.13±1.22      |                         |
|                                | 100        | 5                      | 100           | 14.97±1.55      |                         |
|                                | 100        | 5                      | 300           | 4.57±0.94       |                         |
| <b>ApoA-I<sub>Milano</sub></b> | 100        | 5                      | 10            | 37.90±1.19      | 66.99                   |
|                                | 100        | 5                      | 50            | 26.40±2.12      |                         |
|                                | 100        | 5                      | 100           | 10.83±1.51      |                         |
|                                | 100        | 5                      | 300           | 6.79±1.04       |                         |

Data expressed as mean ± SD. Data were averaged from three independent assays.

**Supplemental Table 2.** Serum PON arylesterase activity 24 hours post rHDLs injection.

| <b>Group</b>      | <b>U/mg</b>   |
|-------------------|---------------|
| <b>Saline</b>     | 184.37 ±13.41 |
| <b>SPC</b>        | 193.93± 14.96 |
| <b>rHDLwt</b>     | 195.86± 39.32 |
| <b>rHDL74</b>     | 208.30± 10.38 |
| <b>rHDLmilano</b> | 201.94± 10.85 |
